# Supplementary material for: Fabrication of POSS-embedded supramolecular hyperbranched polymers with multi-responsive morphology transitions
Source: Royal Society of Chemistry journal article supplement (doi:10.1039/c8py01271g), 2018-01-01
Supplement: c8py01271g1.pdf [file c8py01271g1.pdf]

## **Fabrication of POSS-embedded supramolecular hyperbranched polymers with multi-responsive morphology transitions**

Guoke Tang,<sup>‡a,b,c</sup> Xing Wang,<sup>‡c</sup> Dawei Li,<sup>\*d</sup> Yuanzheng Ma,<sup>\*a,d</sup> and Decheng Wu<sup>\*c,e</sup>

<sup>a</sup> The First School of Clinical Medicine, Southern Medical University, Sha Tai South Road, Baiyun District, Guangzhou 510515, China

<sup>b</sup> Department of Spinal Surgery, Zhuzhou Central Hospital, Changjiang South Road, Tianyuan District, Zhuzhou, Hunan 412000, China

<sup>c</sup> Beijing National Laboratory for Molecular Sciences, State Key Laboratory of Polymer Physics & Chemistry, Institute of Chemistry, Chinese Academy of Sciences, Beijing 100190, P.R. China

<sup>d</sup> Department of Orthopaedics, The 309th Hospital of the PLA, Beijing 100091, China

<sup>e</sup> University of Chinese Academy of Sciences, Beijing 100049, P.R. China

<sup>‡</sup> These authors contributed equally to this work

E-mail: ldw309@126.com; mayuanzheng309@163.com; dcwu@iccas.ac.cn

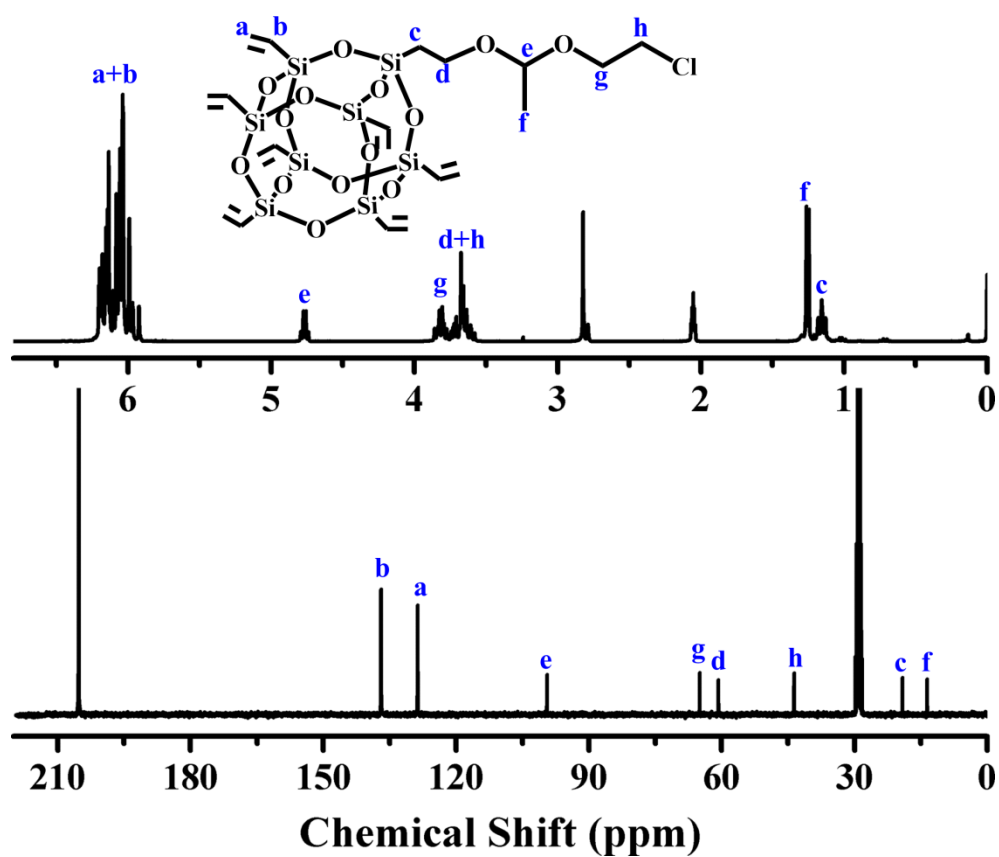

Fig. S1 <sup>1</sup>H and <sup>13</sup>C NMR spectra of the Cl-acetal-POSS-(vinyl)<sub>7</sub> at CDCl<sub>3</sub>.

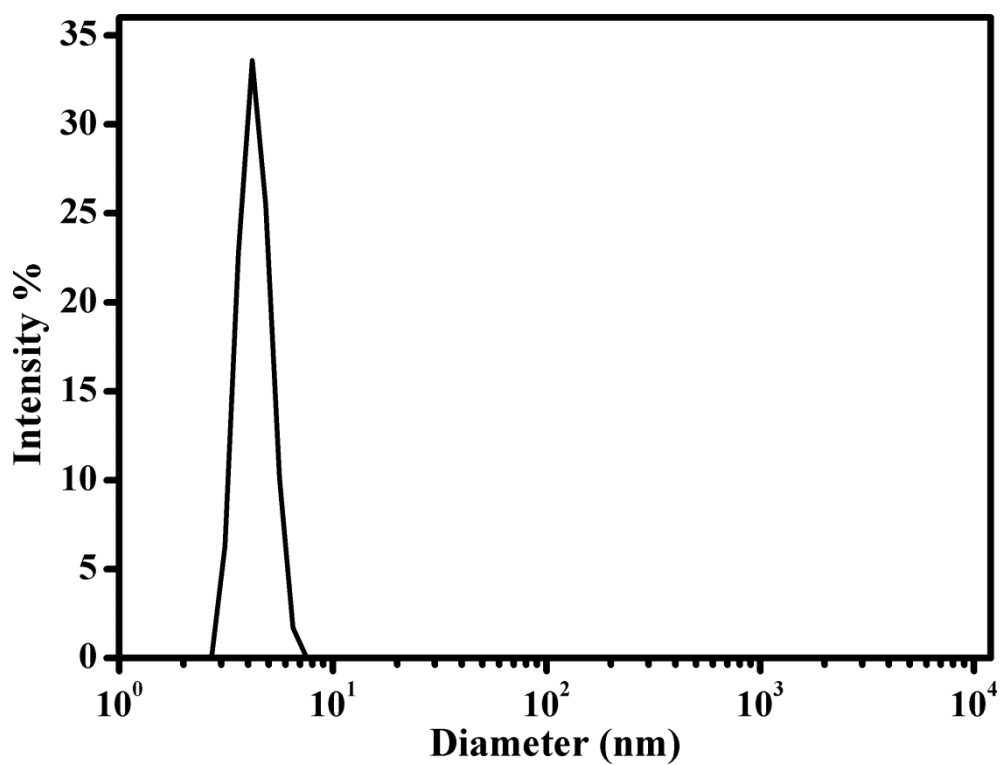

Fig. S2 DLS profile of Azo-acetal-POSS-(CD)<sub>7</sub> in DMF at concentration of 1 mg/mL.

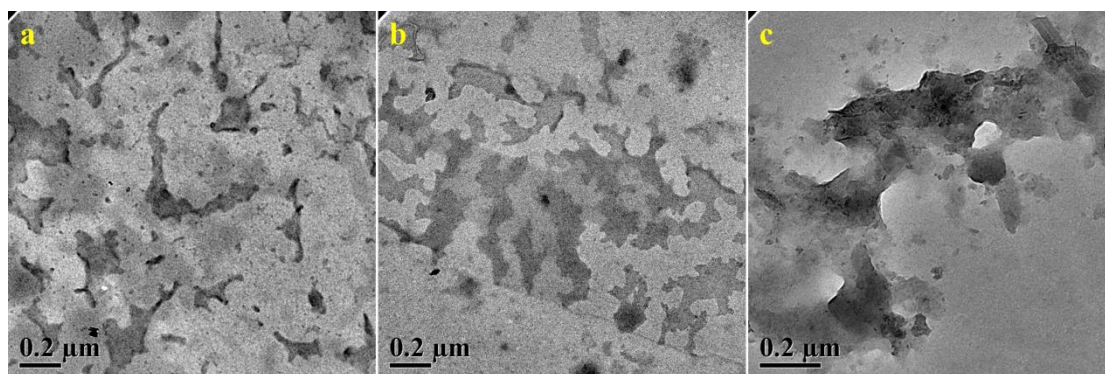

**Fig. S3** TEM images of the POSS-SSHPs formations at the concentration of (a) 12, (b) 15 and (c) 18 mg/mL in aqueous solutions.

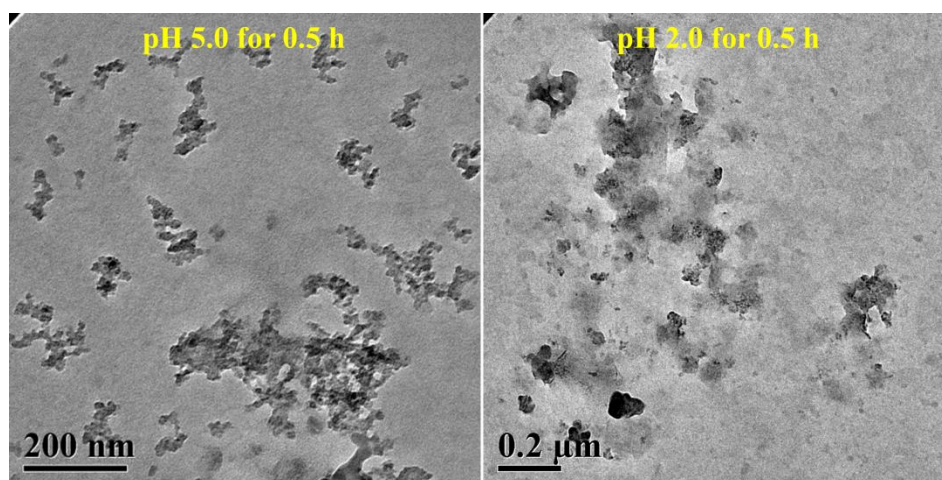

**Fig. S4** TEM images of the nanoparticles after various treatment conditions.

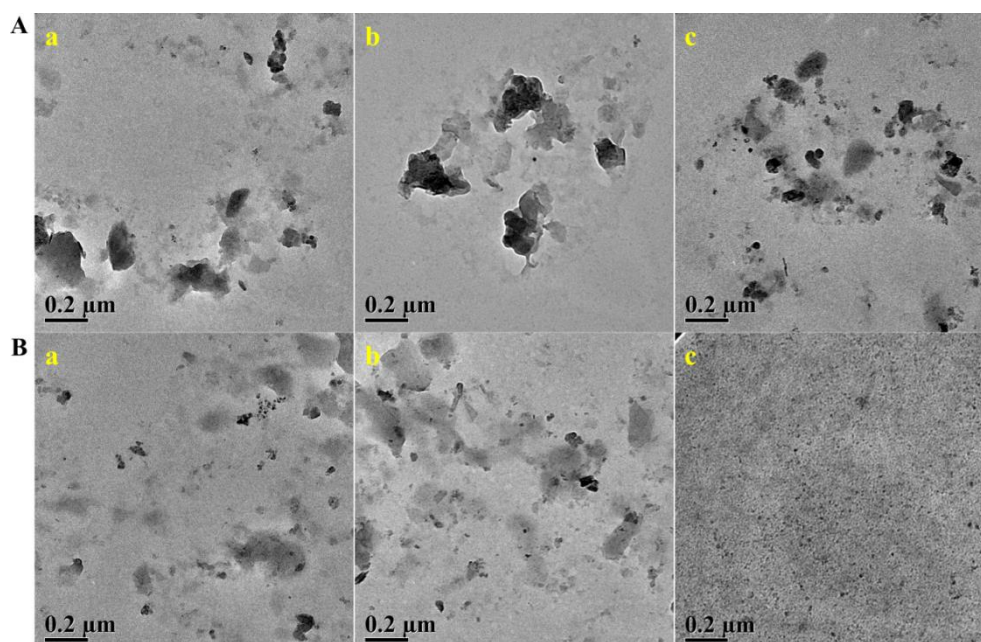

**Fig. S5** TEM images of the self-assemblies (10 mg/mL) in (a) acetone/H<sub>2</sub>O, (b) MeOH/H<sub>2</sub>O and (c) DMF/H<sub>2</sub>O mixtures after treatment of (A) pH 2.0 for 0.5 h and (B) UV irradiation for 5 min.
